# Supplementary material
Source: PubMed Central journal article supplement (PMC3262122)
Supplement: NIHMS344480-supplement-1_si_001.pdf [file NIHMS344480-supplement-1_si_001.pdf]

# Real Time Molecular Imaging of TCA Cycle Metabolism *In Vivo* By Hyperpolarized 1-<sup>13</sup>C Diethyl Succinate

*Niki M. Zacharias*<sup>1,2</sup>, *Henry R. Chan*<sup>1</sup>, *Napapon Sailasuta*<sup>1</sup>, *Brian D. Ross*<sup>1</sup>, *Pratip Bhattacharya*<sup>\*1</sup>

<sup>1</sup> Enhanced MR Laboratory, Huntington Medical Research Institutes, Pasadena, CA

<sup>2</sup> Division of Chemistry and Chemical Engineering, California Institute of Technology, Pasadena, CA

[pratip@hmri.org](mailto:pratip@hmri.org)

| Mouse # | Injection type             | Succinate | Malate | Fumarate | Aspartate | Conc. Diethyl succinate |
|---------|----------------------------|-----------|--------|----------|-----------|-------------------------|
| 1       | i.v.                       | X         | X      | X        | X         | 24 mM                   |
| 2       | i.v.                       | X         | X      |          |           | 24 mM                   |
| 3       | i.v.                       | X         | X      |          | X         | 20 mM                   |
| 4       | i.v.                       | X         | X      | X        | X         | 20 mM                   |
| 5       | i.v.                       | X         | X      | X        | X         | 20 mM                   |
| 6       | i.v.                       | X         | X      |          | X         | 20 mM                   |
| 7       | i.v.                       | X         | X      |          | X         | 20 mM                   |
| 8*      | i.p. (1 <sup>st</sup> inj) |           | X      | X        | X         | 20 mM                   |
|         | i.p. (2 <sup>nd</sup> inj) | X         | X      | X        | X         | 20 mM                   |
| 9*      | i.v. (1 <sup>st</sup> inj) | X         | X      | X        | X         | 20 mM                   |
|         | i.p. (2 <sup>nd</sup> inj) |           | X      | X        |           | 20 mM                   |
| 10*     | i.v. (1 <sup>st</sup> inj) | X         | X      | X        | X         | 20 mM                   |
|         | i.p. (2 <sup>nd</sup> inj) | X         | X      | X        | X         | 20 mM                   |
| 12      | i.v.                       | X         | X      | X        | X         | 20 mM                   |
| 13      | i.v.                       | X         | X      | X        | X         | 20 mM                   |
| 14      | i.v.                       | X         | X      | X        | X         | 20 mM                   |

**Supplement Table 1:** Table of Metabolites seen in first injection of hyperpolarized diethyl succinate.

Because we only performed four i.p. injections, the \*asterisks experiments are included in the table.

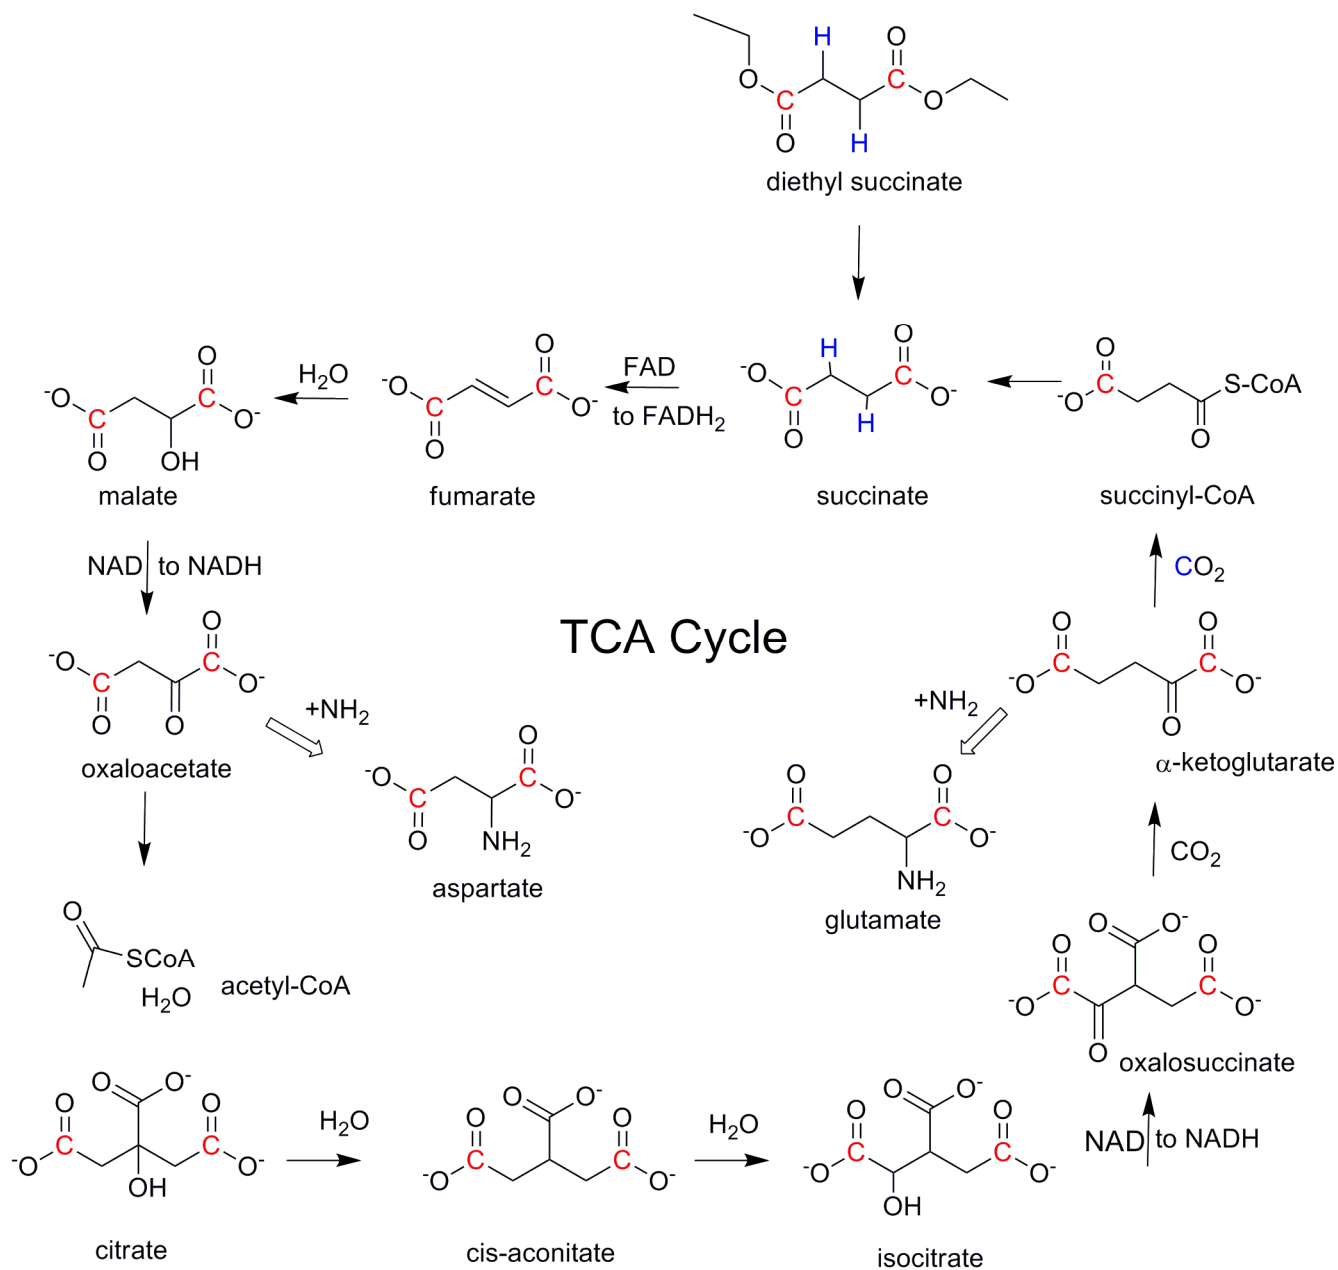

**Supplement Figure 1:** A diagram representing TCA cycle metabolites arising from hyperpolarized  $1\text{-}^{13}\text{C}$  succinate. Any of the red carbons of the metabolites could be in the hyperpolarized state from the metabolism of hyperpolarized  $^{13}\text{C}$  labeled succinate. Based on our technique, only hyperpolarized metabolites will be seen with *in vivo*  $^{13}\text{C}$  MRS. In our current experiments, we are seeing the left hand side of this diagram (fumarate, malate and aspartate).
